# Supplementary material for: Porous perovskite CaMnO3/rGO hybrid as an efficient electrocatalyst in lithium–oxygen batteries
Source: Royal Society of Chemistry journal article supplement (doi:10.1039/d2dt02691k), 2022-01-01
Supplement: d2dt02691k1.pdf [file d2dt02691k1.pdf]

## Supporting Information

### **Porous perovskite CaMnO<sub>3</sub>/rGO hybrid as an efficient electrocatalyst in lithium-oxygen batteries**

Shaghayegh Biniazi <sup>a</sup>, Hamed Asgharzadeh <sup>a\*</sup>, Iraj Ahadzadeh<sup>b</sup>, Özkan Aydın<sup>c</sup>, Murat Farsak<sup>d\*</sup>

<sup>a</sup> Nanostructured and Novel Materials Laboratory (NNML), Department of Materials Engineering, University of Tabriz, 51666-16471, Tabriz, Iran

<sup>b</sup> Research Laboratory of Electrochemical Instrumentation and Energy Systems, Department of Physical Chemistry, Faculty of Chemistry, University of Tabriz, Tabriz, Iran

<sup>c</sup> Osmaniye Korkut Ata University, Engineering Faculty, Department of Chemical Engineering, Turkey

<sup>d</sup> Osmaniye Korkut Ata University, Institute of Natural and Applied Science, Department of Battery Systems and Hydrogen Technologies, Turkey

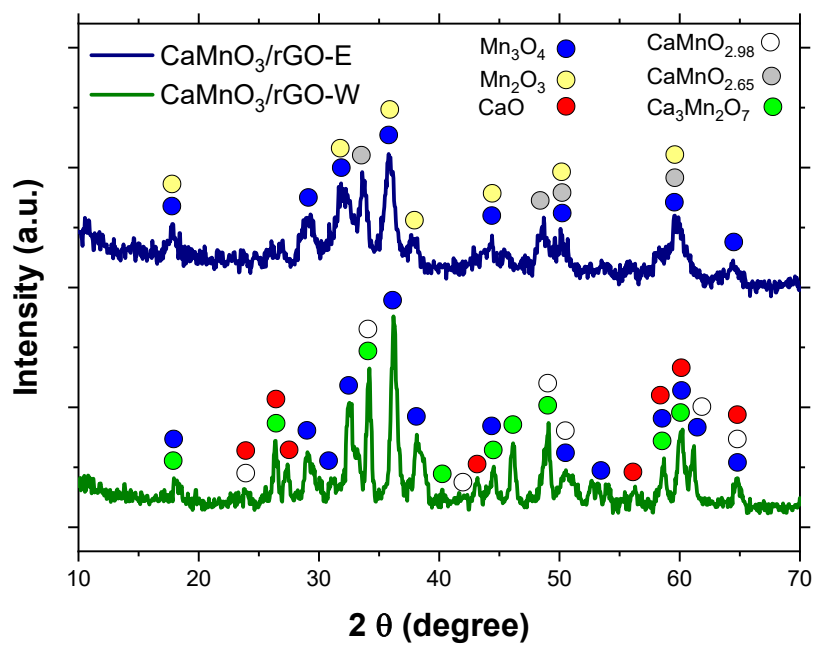

**Figure S1.** XRD patterns of the CaMnO<sub>3</sub>/rGO prepared by the solvothermal method in ethanol (CaMnO<sub>3</sub>/rGO-E) and water (CaMnO<sub>3</sub>/rGO-W) media.

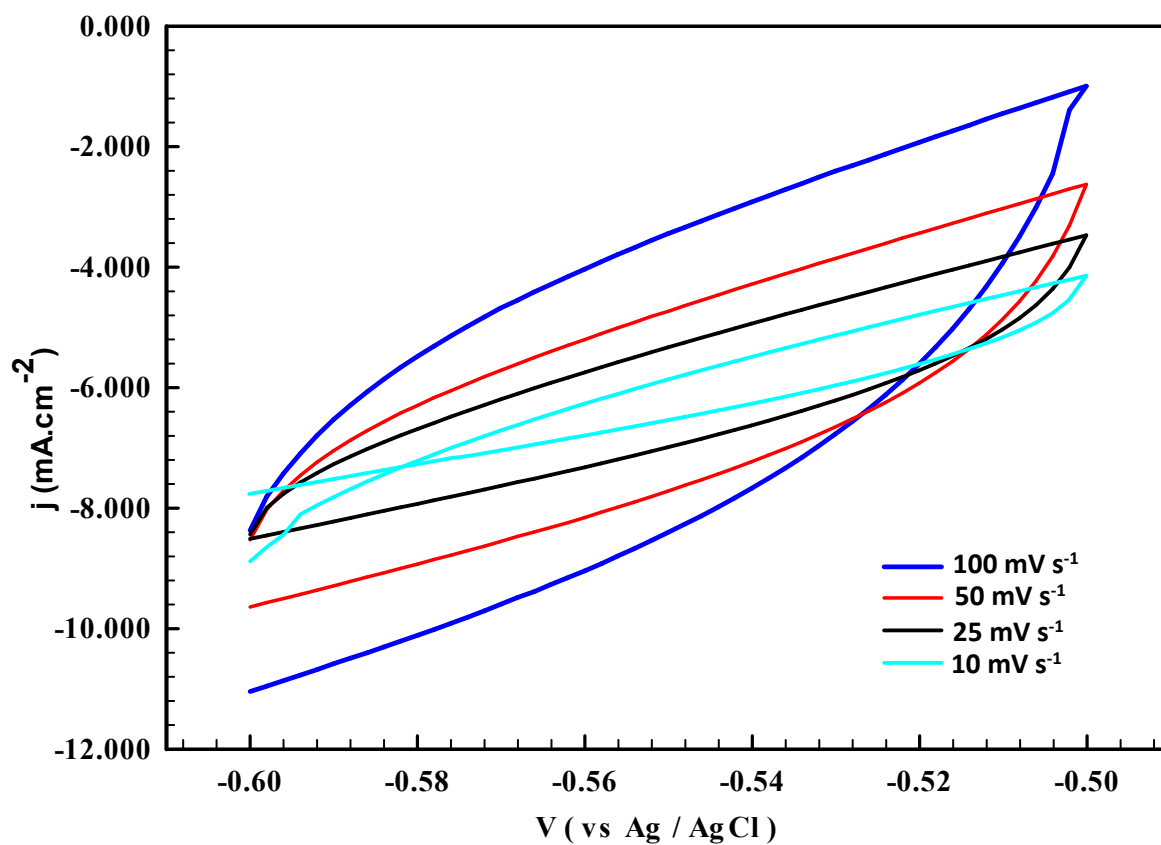

**Figure S2.** The Cyclic voltammograms of the CaMnO<sub>3</sub>/rGO electrode in the alkaline solution at different scan rates.
